# Supplementary material for: Prion-like propagation of human brain-derived alpha-synuclein in transgenic mice expressing human wild-type alpha-synuclein
Source: Springer Nature journal article supplement (doi:10.1186/s40478-015-0254-7), 2015-11-26
Supplement: MOESM1 [file 25665828]

**Table S1** Antibodies used for immunofluorescence, immunohistochemistry, and western blotting

| Target (alternative name) [antibody clone]            | Source            | Catalogue number | Host   | Dilution (IF/IHC) | Antigen retrieval <sup>a</sup> | Dilution (WB) |
|-------------------------------------------------------|-------------------|------------------|--------|-------------------|--------------------------------|---------------|
| alpha-Synuclein [Syn211]                              | Merck Millipore   | 36-008           | Mouse  | 1:100             | Citrate buffer                 | 1:2000        |
| alpha-Synuclein [Clone 42]                            | BD Biosciences    | 610787           | Mouse  | 1:500             | Citrate buffer                 | 1:1000        |
| alpha-Synuclein (phospho S129) [81A]                  | Covance           | MMS-5091         | Mouse  | 1:200             | Citrate buffer                 | 1:1000        |
| alpha-Synuclein (phospho S129) [EP1536Y]              | Abcam             | AB51253          | Rabbit | 1:200             | Citrate buffer                 | 1:1000        |
| alpha-Synuclein (phospho S129) [pSyn#64]              | Wako              | 015-25191        | Mouse  | –                 | Citrate buffer                 | 1:1000        |
| Glial fibrillary acidic protein (GFAP)                | Dako              | Z0334            | Rabbit | 1:400             | Citrate buffer                 | –             |
| Heat shock cognate 71 kDa protein (Hsc70)             | Abcam             | AB19136          | Rat    | 1:100             | Citrate buffer                 | –             |
| Iba1                                                  | Wako              | 019-19741        | Rabbit | 1:400             | Citrate buffer                 | –             |
| Neurofilament light polypeptide (NF-L)                | Cell Signalling   | 2837             | Rabbit | 1:200             | Citrate buffer                 | 1:1000        |
| Tau (phospho-PHF-tau pSer202+Thr205) [AT8]            | Thermo Scientific | MN1020B          | Mouse  | 1:1000            | Formic acid                    | –             |
| TAR DNA-binding protein 43 (phospho TDP-43 pS409/410) | Cosmo Bio         | TTP-PTD-P02      | Rabbit | 1:2000            | Formic acid                    | –             |
| Sequestosome-1 (p62)                                  | Proteintech       | 18420-1-AP       | Rabbit | 1:100             | Citrate buffer                 | –             |
| Tubulin beta chain                                    | Thermo Scientific | MA5-16308        | Mouse  | –                 | Citrate buffer                 | 1:1000        |
| Tubulin beta-3 chain                                  | Covance           | PRB-435P         | Rabbit | 1:1000            | Citrate buffer                 | –             |
| Ubiquitin (Ubi-1)                                     | Merck Millipore   | MAB1510          | Mouse  | 1:500             | Formic acid                    | –             |

<sup>a</sup> Formic acid treatment: 10% formic acid for 15 min at room temperature
