# Supplementary material for: Prion-like propagation of human brain-derived alpha-synuclein in transgenic mice expressing human wild-type alpha-synuclein
Source: Springer Nature journal article supplement (doi:10.1186/s40478-015-0254-7), 2015-11-26

**Additional file 2** Brains of MSA and probable iLBD cases contain phosphorylated alpha-synuclein in the sarkosyl-insoluble fraction

The amount of alpha-synuclein in the sarkosyl-insoluble fraction of brain homogenate from the MSA1, MSA2, and iLBD1 cases was quantified (Table 1). Equal amounts of protein were used to immunoprecipitate alpha-synuclein from each sarkosyl-insoluble fraction with the clone 42 antibody against alpha-synuclein. Proteins were separated by SDS-polyacrylamide gel electrophoresis and detected with the pSyn#64 antibody against phosphorylated alpha-synuclein **(a)**. Phosphorylated alpha-synuclein was not detectable when the primary pSyn#64 antibody against phosphorylated alpha-synuclein was omitted **(b)**. \* = IgG light chain. Molecular sizes are shown in kilodalton.

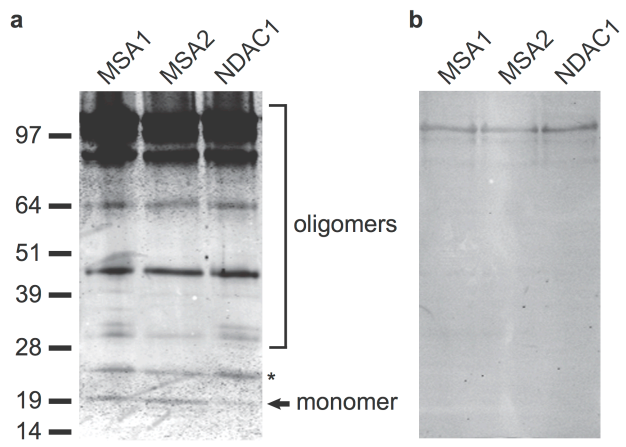

Supplement: MOESM2 [file 25665828]
