# Supplementary material for: Prion-like propagation of human brain-derived alpha-synuclein in transgenic mice expressing human wild-type alpha-synuclein
Source: Springer Nature journal article supplement (doi:10.1186/s40478-015-0254-7), 2015-11-26

**Additional file 4** Phosphorylated alpha-synuclein in inclusion bodies occasionally colocalizes with astrocytes and microglia

Confocal imaging of brain sections of Tg(SNCA)<sup>1Nbm</sup>/J mice injected with brain extracts from MSA or probable iLBD cases shows that at 9 months post injection punctate aggregates of phosphorylated alpha-synuclein, as seen with staining with the 81A antibody (**a-d**), occasionally localize to astrocytes, as seen with staining for GFAP (**e-h**), when both images are merged (**i-l**). In addition, staining with the 81A antibody for phosphorylated alpha-synuclein (**m-p**) shows that punctate aggregates of phosphorylated alpha-synuclein also occasionally localize to microglia, as seen with staining for Iba1 (**q-t**), when both images are merged (**u-x**). Nuclei were stained with DAPI (blue). Scale bar = 10  $\mu\text{m}$ .

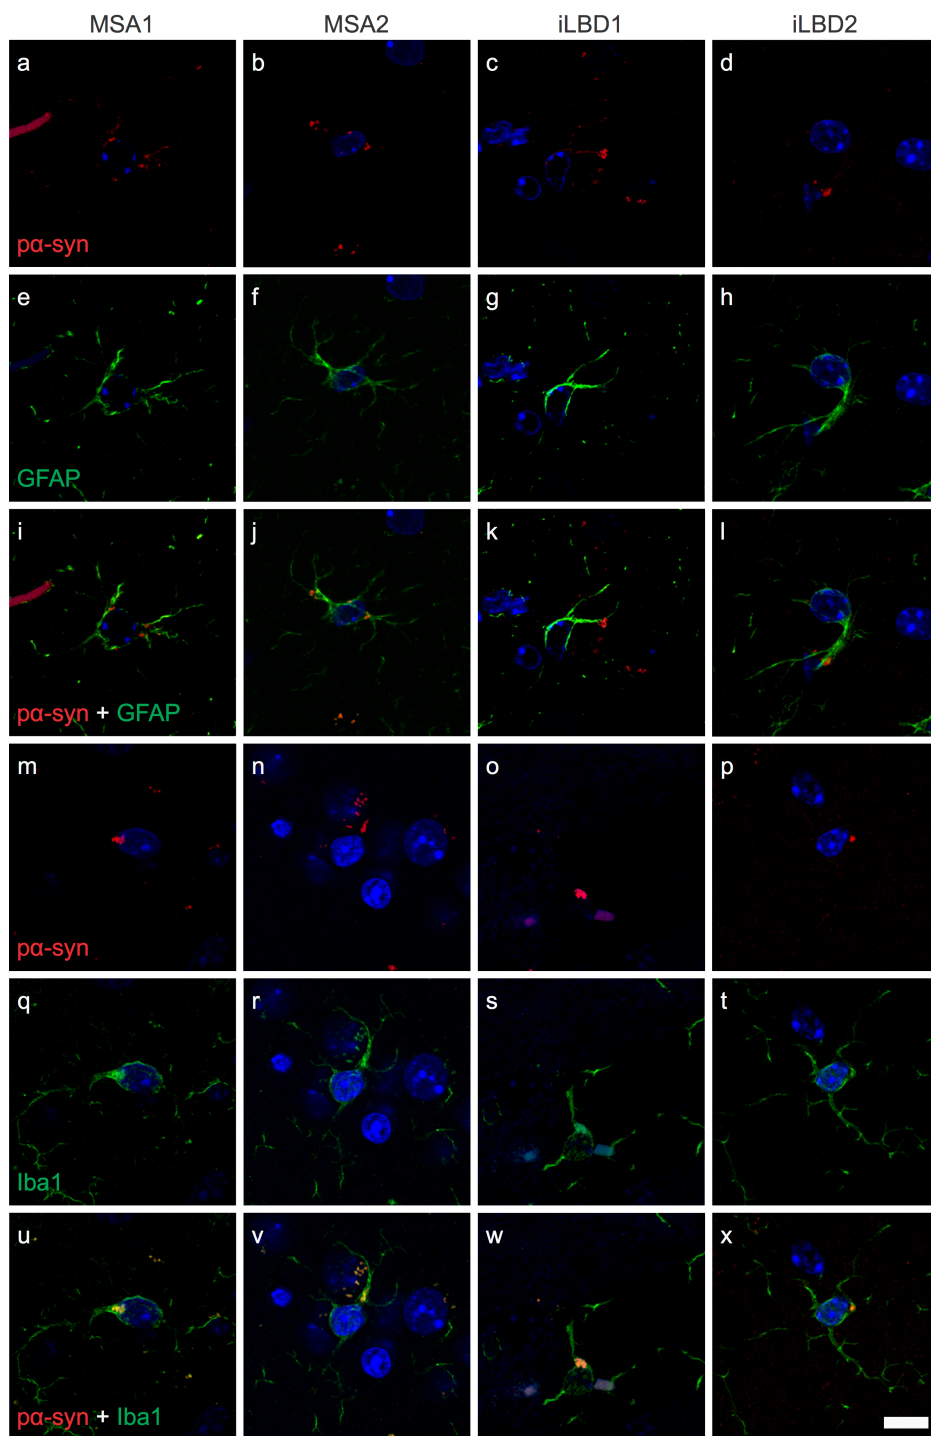

Supplement: MOESM4 [file 25665828]
