# Supplementary material for: Prion-like propagation of human brain-derived alpha-synuclein in transgenic mice expressing human wild-type alpha-synuclein
Source: Springer Nature journal article supplement (doi:10.1186/s40478-015-0254-7), 2015-11-26

**Additional file 6** Reactive astrocytic gliosis in aged Tg(SNCA)<sup>1Nbm</sup>/J mice

Immunohistochemical staining of mouse brain sections with antibodies against glial fibrillary acidic protein (GFAP) revealed mild reactive astrocytic gliosis within the hippocampus of all mice sacrificed at 9 months post injection, regardless whether brain extract from MSA or probable iLBD patients, or PBS was injected. Scale bar = 100  $\mu$ m.

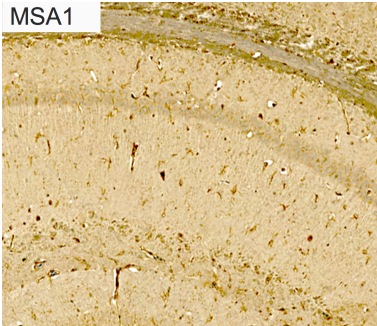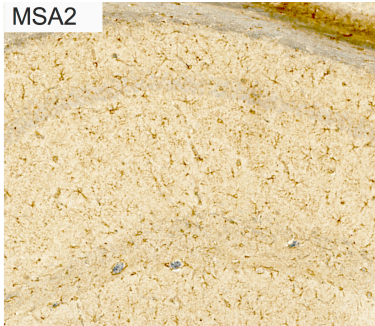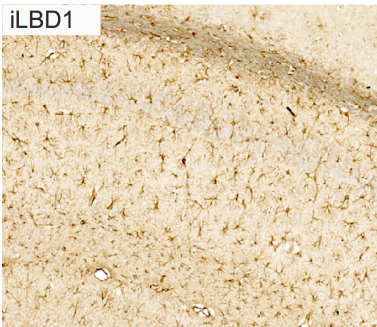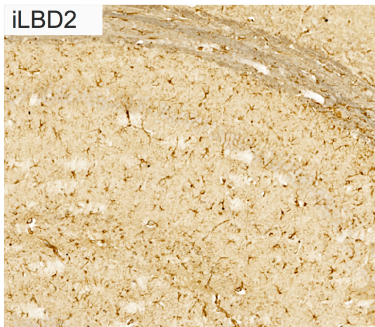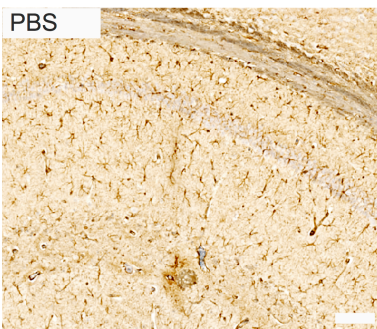

Supplement: MOESM6 [file 25665828]
