# Supplementary material for: Prion-like propagation of human brain-derived alpha-synuclein in transgenic mice expressing human wild-type alpha-synuclein
Source: Springer Nature journal article supplement (doi:10.1186/s40478-015-0254-7), 2015-11-26

**Additional file 7** DAB-staining for Iba1 in aged Tg(SNCA)<sup>1Nbm</sup>/J mice

Brain sections of mice sacrificed at 9 months post injection were stained with antibodies against allograft inflammatory factor 1 (Iba1). Brains of mice injected with brain extracts from MSA or probable iLBD patients did not reveal increased microglial activation versus mouse brains injected with PBS. Unlike activated microglia with a more amoeboid morphology, the microglia observed here had the ramified morphology of resting microglia. Shown are cortical brain regions. Scale bar = 100  $\mu$ m.

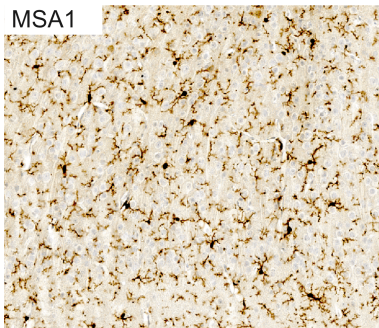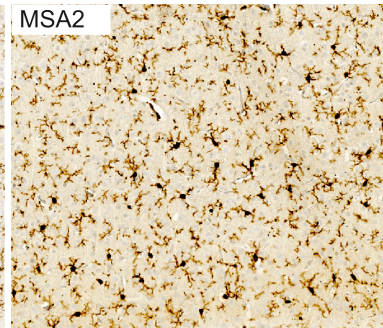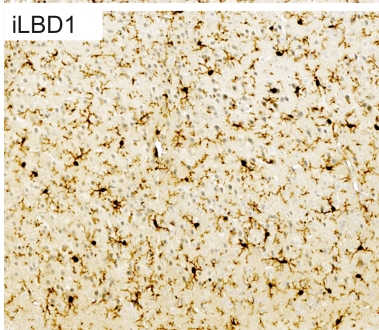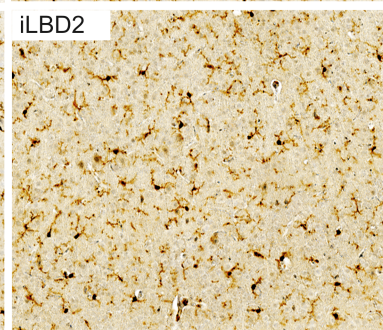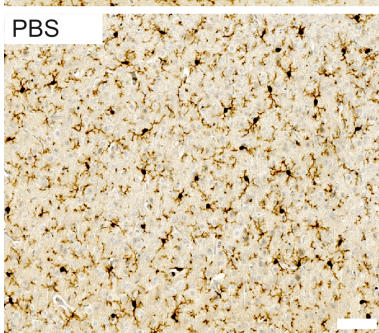

Supplement: MOESM7 [file 25665828]
