# Supplementary material for: Prion-like propagation of human brain-derived alpha-synuclein in transgenic mice expressing human wild-type alpha-synuclein
Source: Springer Nature journal article supplement (doi:10.1186/s40478-015-0254-7), 2015-11-26

**Additional file 8** Brains of mice injected with brain extracts from MSA and probable iLBD cases did not accumulate phosphorylated alpha-synuclein that was sarkosyl insoluble

Sarkosyl-insoluble fractions from brains of Tg(SNCA)<sup>1Nbm</sup>/J mice injected with brain extracts from MSA or probable iLBD cases or PBS were biochemically analyzed at 9 months post injection. Only a very faint band for monomeric phosphorylated alpha-synuclein became detectable with the 81A antibody after long exposure. Importantly, levels of phosphorylated alpha-synuclein were not elevated in animals injected with brain extracts from MSA or probable iLBD cases in comparison to animals injected only with PBS. Oligomeric species of phosphorylated alpha-synuclein were not detectable at all. Molecular sizes are shown in kilodalton.

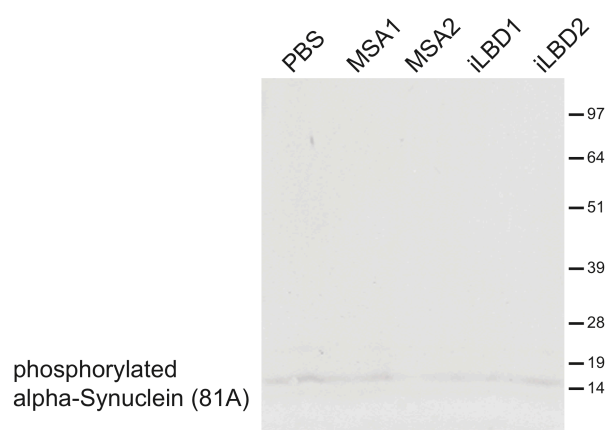

Supplement: MOESM8 [file 25665828]
